# Supplementary material for: Sequentially induced motor neurons from human fibroblasts facilitate locomotor recovery in a rodent spinal cord injury model
Source: eLife. 2020 Jun 23;9:e52069. doi: 10.7554/eLife.52069 (PMC7311175; doi:10.7554/eLife.52069)
Supplement: Figure 1—source data 1. [file elife-52069-fig1-data1.xlsx]

## Sheet: Sheet1
Figure 1I. Quantification of TUJ1+ neurons depending on MN TF
	TUJ1+
	iMNICs	PAX6	NKX6.1	OLIG2	LIM1	LHX3
Adherent	58.1	30.5	54.5	25.4667	47.9	53.6
Sphere	98.2	97.3	97.5	53.6	99.2	97.4
Figure 1J. Quantification of HB9+TUJ1+ neurons depending on MN TF
	HB9+TUJ1+
	iMNICs	PAX6	NKX6.1	OLIG2	LIM1	LHX3
Adherent	0.683333	0	0.633333	0	0.616667	16.7167
Sphere	0.9	0	0.516667	0	0.833333	96.0833
Figure 1-figure supplement 2B. qRT-PCR analysis of MN genes in cells after POU3F1 induction and iMNIC clones
	ISL1	HB9	NKX6.1	LHX3
POU5F1 D7	188.706	4.89621	7.72749	1.31798
POU5F1 D7	1370.04	2.81214	8.73415	6.24052
HF1-iMNIC2	9497.51	10.6664	23.6976	5.29636
HF1-iMNIC5	7903.81	3.02444	8.11168	1.63203
HF1-iMNIC6	1750.24	5.80247	7.34451	11.2356
Figure 1-figure supplement 5B. qRT-PCT analysis of endogenous expression of POU5F1, NANOG, SOX2 in the cells after POU5F1 induction, iMNICs, iMNs, H9 ESCs, and NPCs.
	D3	D5	D7	D10	D14	iMNICs	iMNs	H9	NSCs
POU5F1	2.04675	2.46798	3.57184	3.36359	5.09824	2.21914	4.14106	7298.24	4.65893
NANOG	4.63746	2.66968	3.59668	5.93809	10.6295	4.85678	4.76783	127488	1.74513
SOX2	1.27162	1.47768	1.08925	3.71493	1.73307	1.0693	2.81539	404749	1019.28
