# Supplementary material for: Sequentially induced motor neurons from human fibroblasts facilitate locomotor recovery in a rodent spinal cord injury model
Source: eLife. 2020 Jun 23;9:e52069. doi: 10.7554/eLife.52069 (PMC7311175; doi:10.7554/eLife.52069)
Supplement: Figure 2—source data 1. [file elife-52069-fig2-data1.xlsx]

## Sheet: Sheet1
Figure 2C. qRT-PCR analysis of MN gene expressions in iMNs.
	iMNs	H9-MNs
LIM	448.822	164.279
LHX3	6630.95	921.815
NKX6.1	42.0296	14.9631
HB9	5250.84	6817.37
ISL1	54602	27618.2
