# Supplementary material for: Sequentially induced motor neurons from human fibroblasts facilitate locomotor recovery in a rodent spinal cord injury model
Source: eLife. 2020 Jun 23;9:e52069. doi: 10.7554/eLife.52069 (PMC7311175; doi:10.7554/eLife.52069)
Supplement: Figure 5—source data 1. [file elife-52069-fig5-data1.xlsx]

## Sheet: Sheet1
Figure 5G. qRT-PCR analysis of cervical and thoracic HOX genes in HF1-iMNINs, HF1-iMNs, H9-MNs and NPCs.
	HF1-iMNICs	HF1-iMNs	H9-MNs	NPCs
HOXC4	26.2941	207.457	521.552	5.38893
HOXC5	54.4427	43.5118	141.37	0.198425
HOXC6	28.1813	40.4107	16.4498	0.0066152
HOXA7	23.1029	35.1796	3.21169	0.0053981
HOXC8	26.7228	51.6251	11.3399	0.0766803
HOXA9	125.076	130.388	11.5514	0.0329175
HOXC9	304.437	303.033	44.0173	0.0712977
