# Supplementary material for: Sequentially induced motor neurons from human fibroblasts facilitate locomotor recovery in a rodent spinal cord injury model
Source: eLife. 2020 Jun 23;9:e52069. doi: 10.7554/eLife.52069 (PMC7311175; doi:10.7554/eLife.52069)
Supplement: Supplementary file 5. [file elife-52069-supp5.xlsx]

## Sheet: Sheet1
RNA seq data sequence summary
Lane	Sample_ID	Designation	Read Order	Index	Yield(Bases)	Reads	% of >= Q30 Bases(PF)	Mean Quality Score(PF)
4	10	HF1	R1	CAACAATG-CTTCACGG	5699739363	56433063	96.5	36.45
4	10	HF1	R2	CAACAATG-CTTCACGG	5699739363	56433063	93.92	35.92
4	11	HF2	R1	TGGTGGCA-TCCTGTAA	6007363951	59478851	96.45	36.44
4	11	HF2	R2	TGGTGGCA-TCCTGTAA	6007363951	59478851	93.37	35.88
4	13	NPCs	R1	AGGCAGAG-AGAATGCC	3430227751	33962651	96.35	36.43
4	13	NPCs	R2	AGGCAGAG-AGAATGCC	3430227751	33962651	94.51	36.09
4	3	HF1-iMNICs	R1	ATATCTCG-ATCTTAGT	6457980804	63940404	96.46	36.45
4	3	HF1-iMNICs	R2	ATATCTCG-ATCTTAGT	6457980804	63940404	94.25	36.02
4	4	HF2-iMNICs	R1	GCGCTCTA-GCTCCGAC	6443444581	63796481	96.22	36.41
4	4	HF2-iMNICs	R2	GCGCTCTA-GCTCCGAC	6443444581	63796481	94.06	35.97
4	5	HF1-iMNs	R1	AACAGGTT-ATACCAAG	7305272430	72329430	96.59	36.47
4	5	HF1-iMNs	R2	AACAGGTT-ATACCAAG	7305272430	72329430	93.76	35.94
4	6	HF2-iMNs	R1	GGTGAACC-GCGTTGGA	5811623931	57540831	96.33	36.42
4	6	HF2-iMNs	R2	GGTGAACC-GCGTTGGA	5811623931	57540831	94.3	36.02
